# Supplementary material for: Integrating polygenic risk scores and constructing a predictive model to assess the risk of knee osteoarthritis in Taiwanese population
Source: Research Square preprint supplement (doi:10.21203/rs.3.rs-5391580/v1), 2024-12-02
Supplement: Supplementary file 1 [file 7c7ded34ee0e6ef1011f6429.docx]

Supplementary Table 1. Demographic characteristics and associated diseases in TPMI, gender-age matching group, training group and testing group.

|  |  | TPMI, N = 43,686 | | | | | Matching group, N = 6,815 | | | | Training group, N = 5,452 | | | | | Testing group, N = 1,363 | | | | |
| --- | --- | --- | --- | --- | --- | --- | --- | --- | --- | --- | --- | --- | --- | --- | --- | --- | --- | --- | --- | --- |
|  |  | Case  N=1,363 | | Control  N=42,323 | | *p-*value | Case | Control  N=5,452 | | *p-*value | Case  N=1,123 | | Control  N=4,329 | | *p-*value | Case  N=240 | | Control  N=1,123 | | *p-*value |
|  |  |
|  |  | N | Freq | N | Freq | Freq | N | Freq | N | Freq | N | Freq | N | Freq | N | Freq |
| Age (SD) #  [min, max] |  | 73.1 (10.3)  [31.0, 103.0] | | 57.4 (15.3)  [5.0, 106.0] | | **1×10-307** |  | 73.1 (10.4)  [31.0, 103.0] | | 0.93 | 73.1 (10.3)  [31.0, 99.0] | | 73.0 (10.3)  [31.0, 103.0] | | 0.92 | 73.2 (10.2)  [34.0, 94.0] | | 73.4 (10.5)  [31.0, 101] | | 0.74 |
| Gender$ | M | 395 | 0.9% | 20075 | 46.0% | **2×10-34** | 5.8% | 1595 | 23.4% | 0.87 | 334 | 6.1% | 1252 | 23.0% | 0.62 | 61 | 4.5% | 343 | 25.2% | 0.13 |
|  | F | 968 | 2.2% | 23794 | 54.5% |  | 14.2% | 3857 | 56.6% |  | 789 | 14.5% | 3077 | 56.4% |  | 179 | 13.1% | 780 | 57.2% |  |
| BMI (SD) #  [min, max] |  | 26.5 (4.2)  [16.4, 43.3] | | 24.9 (4.1)  [16.3, 43.6] | | **1×10-48** |  | 24.5 (3.7)  [16.4, 43.3] | | **8×10-64** | 26.5 (4.2)  [16.4, 42.8] | | 24.6 (3.7)  [16.4, 41.1] | | **2×10-49** | 26.7 (4.4)  [17.9, 40.9] | | 24.4 (3.9)  [16.4, 43.3] | | **3×10-16** |
|  |  | Comorbidities | | | | | | | | | | | | | | | | | | |
| Backpain$ | No | 1119 | 2.6% | 41426 | 94.8% | **9×10-80** | 16.4% | 5039 | 73.9% | **1×10-30** | 926 | 17.0% | 3999 | 73.3% | **2×10-23** | 193 | 14.2% | 1040 | 76.3% | **1×10-08** |
|  | Yes | 244 | 0.6% | 2443 | 5.6% |  | 3.6% | 413 | 6.1% |  | 197 | 3.6% | 330 | 6.1% |  | 47 | 3.4% | 83 | 6.1% |  |
| GERD$ | No | 741 | 1.7% | 34979 | 80.1% | **4×10-113** | 10.9% | 3806 | 55.8% | **4×10-27** | 616 | 11.3% | 3021 | 55.4% | **4×10-21** | 125 | 9.2% | 785 | 57.6% | **2×10-07** |
|  | Yes | 622 | 1.4% | 8890 | 20.3% |  | 9.1% | 1646 | 24.2% |  | 507 | 9.3% | 1308 | 24.0% |  | 115 | 8.4% | 338 | 24.8% |  |
| Insomnia$ | No | 880 | 2.0% | 37468 | 85.8% | **2×10-98** | 12.9% | 4167 | 61.1% | **5×10-19** | 731 | 13.4% | 3290 | 60.3% | **2×10-13** | 149 | 10.9% | 877 | 64.3% | **3×10-07** |
|  | Yes | 483 | 1.1% | 6401 | 14.7% |  | 7.1% | 1285 | 18.9% |  | 392 | 7.2% | 1039 | 19.1% |  | 91 | 6.7% | 246 | 18.0% |  |
| Hypertension$ | No | 528 | 1.2% | 30919 | 70.8% | **2×10-138** | 7.7% | 2729 | 40.0% | **9×10-14** | 438 | 8.0% | 2176 | 39.9% | **2×10-11** | 90 | 6.6% | 553 | 40.6% | **1×10-03** |
|  | Yes | 835 | 1.9% | 12950 | 29.6% |  | 12.3% | 2723 | 40.0% |  | 685 | 12.6% | 2153 | 39.5% |  | 150 | 11.0% | 570 | 41.8% |  |
| COPD$ | No | 950 | 2.2% | 38717 | 88.6% | **2×10-93** | 13.9% | 4361 | 64.0% | **3×10-16** | 773 | 14.2% | 3472 | 63.7% | **4×10-16** | 177 | 13.0% | 889 | 65.2% | 0.08 |
|  | Yes | 413 | 0.9% | 5152 | 11.8% |  | 6.1% | 1091 | 16.0% |  | 350 | 6.4% | 857 | 15.7% |  | 63 | 4.6% | 234 | 17.2% |  |
| Dyslipidemia$ | No | 604 | 1.4% | 29973 | 68.6% | **2×10-77** | 8.9% | 2842 | 41.7% | **3×10-07** | 503 | 9.2% | 2252 | 41.3% | **2×10-05** | 101 | 7.4% | 590 | 43.3% | **4×10-03** |
|  | Yes | 759 | 1.7% | 13896 | 31.8% |  | 11.1% | 2610 | 38.3% |  | 620 | 11.4% | 2077 | 38.1% |  | 139 | 10.2% | 533 | 39.1% |  |
| CKD$ | No | 831 | 1.9% | 35197 | 80.6% | **2×10-67** | 12.2% | 3699 | 54.3% | **2×10-06** | 698 | 12.8% | 2918 | 53.5% | **1×10-03** | 133 | 9.8% | 781 | 57.3% | **3×10-05** |
|  | Yes | 532 | 1.2% | 8672 | 19.9% |  | 7.8% | 1753 | 25.7% |  | 425 | 7.8% | 1411 | 25.9% |  | 107 | 7.9% | 342 | 25.1% |  |
| Stroke$ | No | 1139 | 2.6% | 40878 | 93.6% | **8×10-42** | 16.7% | 4772 | 70.0% | **1×10-04** | 937 | 17.2% | 3793 | 69.6% | **3×10-04** | 202 | 14.8% | 979 | 71.8% | 0.25 |
|  | Yes | 224 | 0.5% | 2991 | 6.8% |  | 3.3% | 680 | 10.0% |  | 186 | 3.4% | 536 | 9.8% |  | 38 | 2.8% | 144 | 10.6% |  |
| Depression$ | No | 1314 | 3.0% | 43123 | 98.7% | **3×10-07** | 19.3% | 5310 | 77.9% | 0.06 | 1085 | 19.9% | 4223 | 77.5% | 0.10 | 229 | 16.8% | 1087 | 79.8% | 0.39 |
|  | Yes | 49 | 0.1% | 746 | 1.7% |  | 0.7% | 142 | 2.1% |  | 38 | 0.7% | 106 | 1.9% |  | 11 | 0.8% | 36 | 2.6% |  |
| Thyroid diseases$ | No | 1051 | 2.4% | 36512 | 83.6% | **4×10-09** | 15.4% | 4335 | 63.6% | 0.06 | 868 | 15.9% | 3446 | 63.2% | 0.10 | 183 | 13.4% | 889 | 65.2% | 0.36 |
|  | Yes | 312 | 0.7% | 7357 | 16.8% |  | 4.6% | 1117 | 16.4% |  | 255 | 4.7% | 883 | 16.2% |  | 57 | 4.2% | 234 | 17.2% |  |
| Duodenal Ulcer$ | No | 1243 | 2.8% | 42378 | 97.0% | **6×10-26** | 18.2% | 5107 | 74.9% | **1×10-03** | 1017 | 18.7% | 4062 | 74.5% | **1×10-04** | 226 | 16.6% | 1045 | 76.7% | 0.63 |
|  | Yes | 120 | 0.3% | 1491 | 3.4% |  | 1.8% | 345 | 5.1% |  | 106 | 1.9% | 267 | 4.9% |  | 14 | 1.0% | 78 | 5.7% |  |
| Colonic Diverticula$ | No | 1318 | 3.0% | 43386 | 99.3% | **2×10-13** | 19.3% | 5330 | 78.2% | **0.03** | 1086 | 19.9% | 4234 | 77.7% | **0.04** | 232 | 17.0% | 1096 | 80.4% | 0.55 |
|  | Yes | 45 | 0.1% | 483 | 1.1% |  | 0.7% | 122 | 1.8% |  | 37 | 0.7% | 95 | 1.7% |  | 8 | 0.6% | 27 | 2.0% |  |
| Diabetes$ | No | 752 | 1.7% | 32217 | 73.7% | **3×10-50** | 11.0% | 3262 | 47.9% | **2×10-03** | 611 | 11.2% | 2616 | 48.0% | **3×10-04** | 141 | 10.3% | 646 | 47.4% | 0.78 |
|  | Yes | 611 | 1.4% | 11652 | 26.7% |  | 9.0% | 2190 | 32.1% |  | 512 | 9.4% | 1713 | 31.4% |  | 99 | 7.3% | 477 | 35.0% |  |
|  |  |  |  |  |  |  |  |  |  |  |  |  |  |  |  |  |  |  |  |  |

# independent t test

$ chi-squared test

SD, standard deviation

M, male

F, female

Yes, number of individuals had disease

No, number of individuals hadn’t disease

N, number

Freq, frequency

GERD, gastroesophageal reflux disease

COPD, chronic obstruction pulmonary disease

CKD, chronic kidney disease

Supplementary Table 2. The descriptive statistics of 4 PGS panels and the associations with Knee OA in TPMI (n = 43,686)

|  |  | PGS001192 | | PGS002729 | | PGS002749 | | PGS002767 | |
| --- | --- | --- | --- | --- | --- | --- | --- | --- | --- |
|  |  | Descriptive statistics | | | | | | | |
| Reported SNPs |  | 4,525 | | 24 | | 10 | | 1,052,275 | |
| retention SNPs |  | 3,974 | | 24 | | 10 | | 957,379 | |
| Mean (SD) |  | 2.98 ×10-5 (2.87×10-5) | | 0.03 (2.74×10-3) | | 0.01 (6.13×10-3) | | 6.87×10-8 (3.76×10-8) | |
| Skewness |  | -0.01 | | 0.01 | | 0.12 | | 0.00 | |
| Kurtosis |  | 0.03 | | -0.05 | | -0.06 | | -0.04 | |
| p-value of Shapiro-Wilk test |  | 0.72 | | 0.89 | | 1.98 ×10-6 | | 0.24 | |
|  |  | Univariable logistic regression analysis | | | | | | | |
|  |  | OR (95% CI) | *p-*value | OR (95% CI) | *p-*value | OR (95% CI) | *p-*value | OR (95% CI) | *p-*value |
| Rank1 |  | Ref | | Ref | | Ref | | Ref | |
| Rank2 |  | 1.20 (1.01-1.43) | 0.04 | 1.07 (0.91-1.28) | 0.41 | 1.18 (0.99-1.40) | 0.07 | 1.04 (0.87-1.25) | 0.64 |
| Rank3 |  | 1.09 (0.92-1.31) | 0.32 | 1.06 (0.89-1.26) | 0.51 | 1.12 (0.94-1.33) | 0.22 | 1.09 (0.91-1.30) | 0.36 |
| Rank4 |  | 1.19 (1.00-1.42) | 0.05 | 1.00 (0.84-1.19) | 0.97 | 1.13 (0.95-1.35) | 0.16 | 1.35 (1.13-1.60) | 7×10-04 |
| Rank5 |  | 1.22 (1.02-1.45) | 0.03 | 1.07 (0.90-1.27) | 0.43 | 1.24 (1.04-1.47) | 0.02 | 1.43 (1.20-1.69) | 7×10-05 |
|  |  |  |  |  |  |  |  |  |  |

SD, standard deviation

Ref, reference

M, male

F, female

OR, odds ratio

CI, confidence interval
