# Supplementary material for: Integrating polygenic risk scores and constructing a predictive model to assess the risk of knee osteoarthritis in Taiwanese population
Source: Research Square preprint supplement (doi:10.21203/rs.3.rs-5391580/v1), 2024-12-02
Supplement: Supplementary file 2 [file d5bed6f417a9be59d6d8a519.docx]

Table1：The association study between PGS002767 and Knee Osteoarthritis along with demographics and comorbidities using logistic regression in training group (N=5,452)

|  |  | Univariable analysis | | Multivariable analysis | |
| --- | --- | --- | --- | --- | --- |
|  |  | OR (95% CI) | *p-*value | OR (95% CI) | *p-*value |
| Age |  | 1.00 (0.99-1.01) | 0.92 | 1.00 (0.99-1.00) | 0.45 |
| Gender | M | Ref | |  | |
|  | F | 0.96 (0.83-1.11) | 0.59 | 1.09 (0.93-1.27) | 0.29 |
| BMI |  | 1.13 (1.11-1.15) | **1×10-45** | 1.12 (1.11-1.15) | **3×10-38** |
|  |  | PGS002767 | | | |
| Rank1 |  | Ref | | | |
| Rank2 |  | 1.10 (0.89-1.37) | 0.37 | 1.10 (0.88-1.39) | 0.39 |
| Rank3 |  | 1.21 (0.97-1.50) | 0.09 | 1.22 (0.97-1.52) | 0.09 |
| Rank4 |  | 1.46 (1.18-1.80) | **4×10-04** | 1.42 (1.14-1.78) | **2×10-03** |
| Rank5 |  | 1.59 (1.29-1.96) | **2×10-05** | 1.49 (1.20-1.86) | **3×10-04** |
|  |  | Comorbidities | | | |
| Backpain |  | 2.58 (2.13-3.12) | **2×10-22** | 1.09 (0.94-1.27) | 0.26 |
| GERD |  | 1.90 (1.66-2.17) | **7×10-21** | 2.17 (1.77-2.65) | **5×10-14** |
| Insomnia |  | 1.70 (1.47-1.95) | **2×10-13** | 1.57 (1.36-1.82) | **2×10-09** |
| Hypertension |  | 1.58 (1.38-1.81) | **2×10-11** | 1.47 (1.26-1.72) | **6×10-07** |
| COPD |  | 1.83 (1.58-2.12) | **5×10-16** | 1.11 (0.95-1.31) | 0.19 |
| Dyslipidemia |  | 1.34 (1.17-1.53) | **2×10-05** | 1.49 (1.27-1.75) | **1×10-06** |
| CKD |  | 1.26 (1.10-1.44) | **9×10-04** | 1.04 (0.89-1.20) | 0.65 |
| Stroke |  | 1.40 (1.17-1.68) | **2×10-04** | 1.01 (0.86-1.18) | 0.93 |
| Depression |  | 1.40 (0.95-2.01) | 0.08 | - | - |
| Thyroid diseases |  | 1.15 (0.98-1.34) | 0.09 | - | - |
| Duodenal Ulcer |  | 1.59 (1.25-2.00) | **1×10-04** | 1.17 (0.90-1.51) | 0.23 |
| Colonic Diverticula |  | 1.52 (1.02-2.21) | **0.03** | 1.36 (0.89-2.03) | 0.14 |
| Diabetes |  | 1.28 (1.12-1.46) | **3×10-04** | 0.98 (0.84-1.15) | 0.84 |

OR, odds ratio

CI, confidence interval

Ref, reference

M, male

F, female

Table2：The genetic correlation between GERD, insomnia, hypertension, and dyslipidemia with Knee OA

|  | GWAS  samples | Overlap  samples | Correlation coefficients with Knee OA | S.E. | *p-*value |
| --- | --- | --- | --- | --- | --- |
| Knee OA | 7620 | - | - | - | - |
| GERD | 37001 | 6615 | 0.50 | 0.46 | 0.28 |
| Insomnia | 33398 | 6697 | 0.51 | 0.55 | 0.36 |
| Hypertension | 34351 | 6495 | 0.28 | 0.27 | 0.29 |
| Dyslipidemia | 35662 | 6697 | 0.04 | 0.24 | 0.87 |
